# Supplementary material
Source: PubMed Central journal article supplement (PMC2171131)
Supplement: JCI0829900sd.pdf [file JCI0829900sd.pdf]

## Supplemental Figure Legends

**Figure S1: A cluster of 59 differentially expressed genes (17 upregulated and 42 downregulated more than 2-fold, see ‘Supplemental Table I’) separates wild-type E $\mu$ -myc lymphomas from TRAIL-R-deficient (TRAIL-R<sup>+/-</sup> and TRAIL-R<sup>-/-</sup>) E $\mu$ -myc lymphomas, but does not distinguish between TRAIL-R<sup>+/-</sup> and TRAIL-R<sup>-/-</sup> E $\mu$ -myc lymphomas.** Total RNA was isolated from wild-type, TRAIL-R<sup>+/-</sup> and TRAIL-R<sup>-/-</sup> E $\mu$ -myc lymphomas (N=5 each genotype) and hybridized to an affymetrix MOE430A 2.0 chip. Data was analyzed using the GeneSpring FX software and genes with a fold change of at least 2-fold and P<0.05 (One-Way ANOVA) were used for expression-based clustering.

**Figure S2: Treatment of cells with JSI-124 (curcubitacin I) enhances TRAIL-mediated cell death.** (A) Interferon alpha (IFN- $\alpha$ ) triggers phosphorylation at Tyr705 of Stat3 in the murine fibrosarcoma cell line L929 but not treatment with TRAIL. Treatment of cells with the phosphotyrosine-stat3 inhibitor JSI-124 triggers synergistic cell killing with TRAIL as determined by trypan blue staining (B) and FITC-Vad-FMK/PI analysis (C). Immunofluorescence (D) of the stat3-target surviving and activated caspase 3 in the human colorectal carcinoma cell line HCT116 suggest reduced nuclear survivin expression (Cy2, green) following treatment with 50 nM JSI-124 and increased activation of caspase-3 (Cy3, red) following combination treatment with TRAIL and JSI-124. Cell nuclei are visualized with DAPI (blue). The average or representative results of two independent experiments are shown. Treatment of HCT116 cells with the combination of TRAIL and JSI-124 (E) for 16 hours triggers synergistic apoptosis as measured by DNA-fragmentation (Sub-G1 %) compared to either treatment alone.

Supplemental Figures

Figure S1

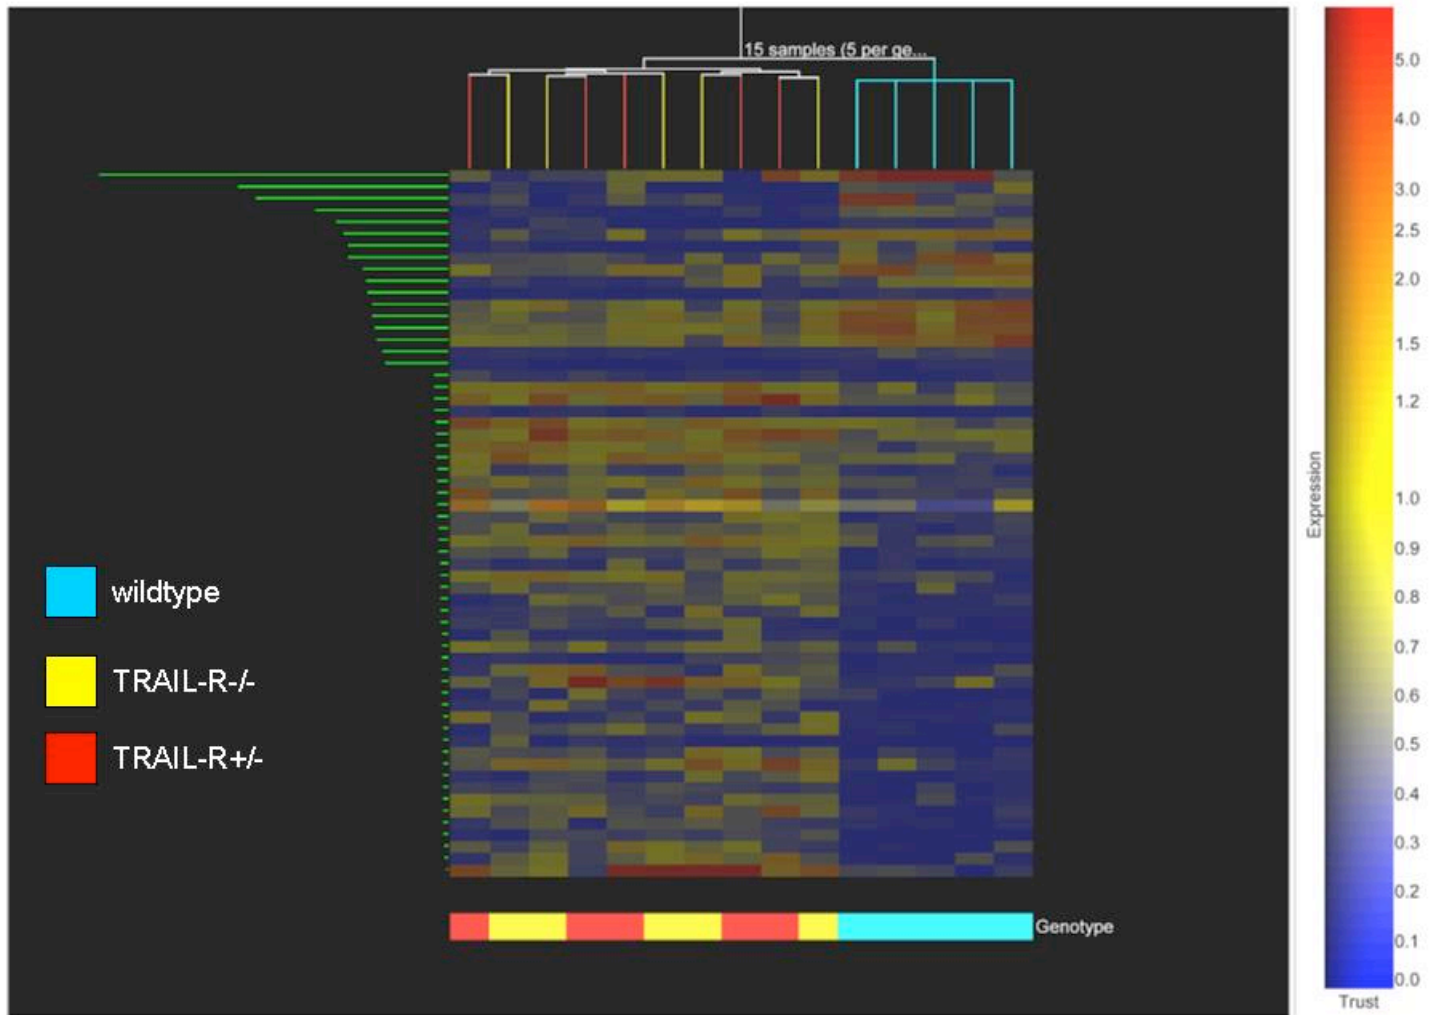

Figure S2

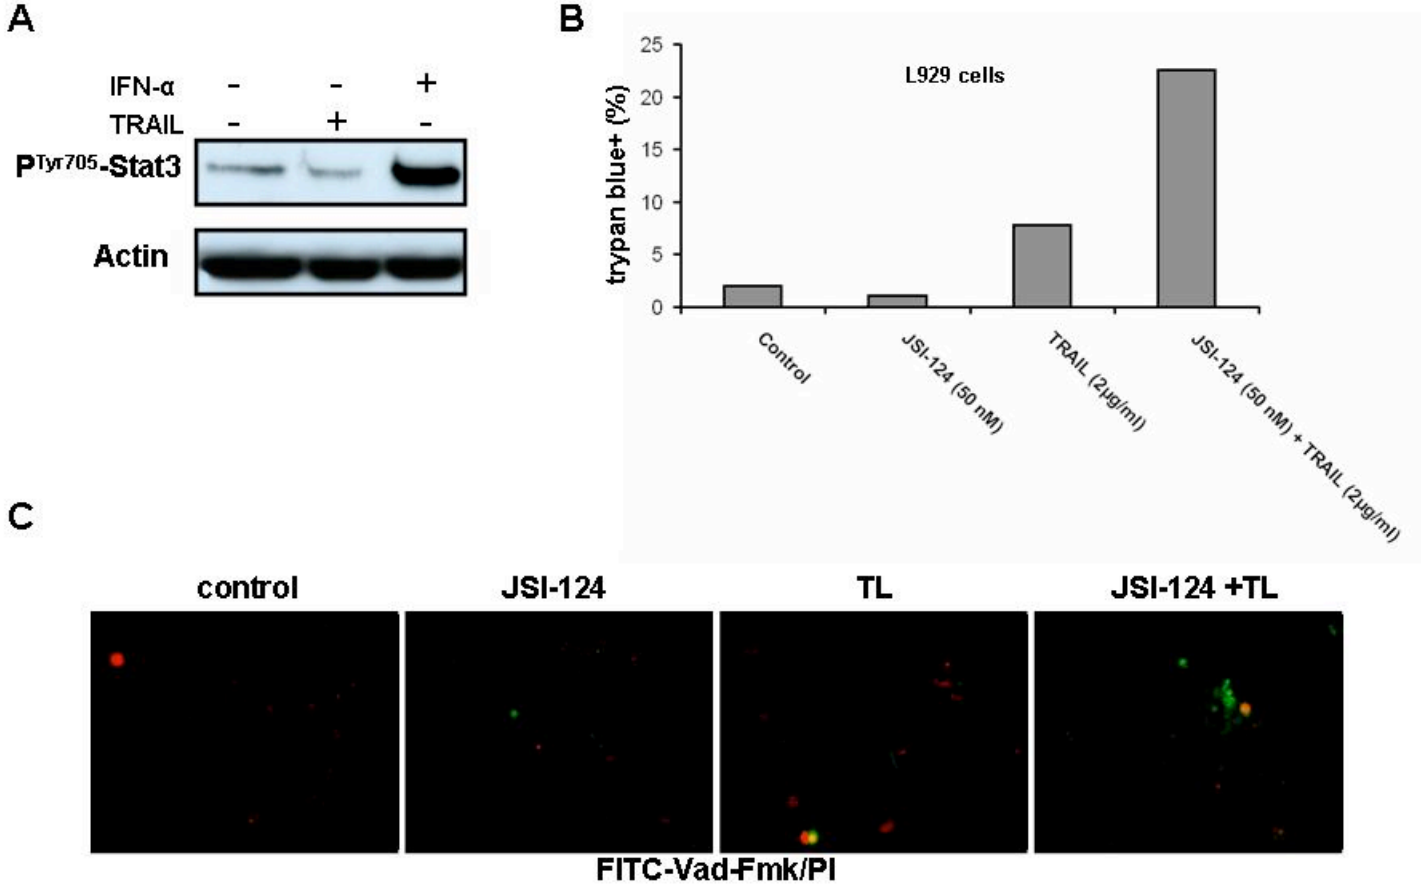

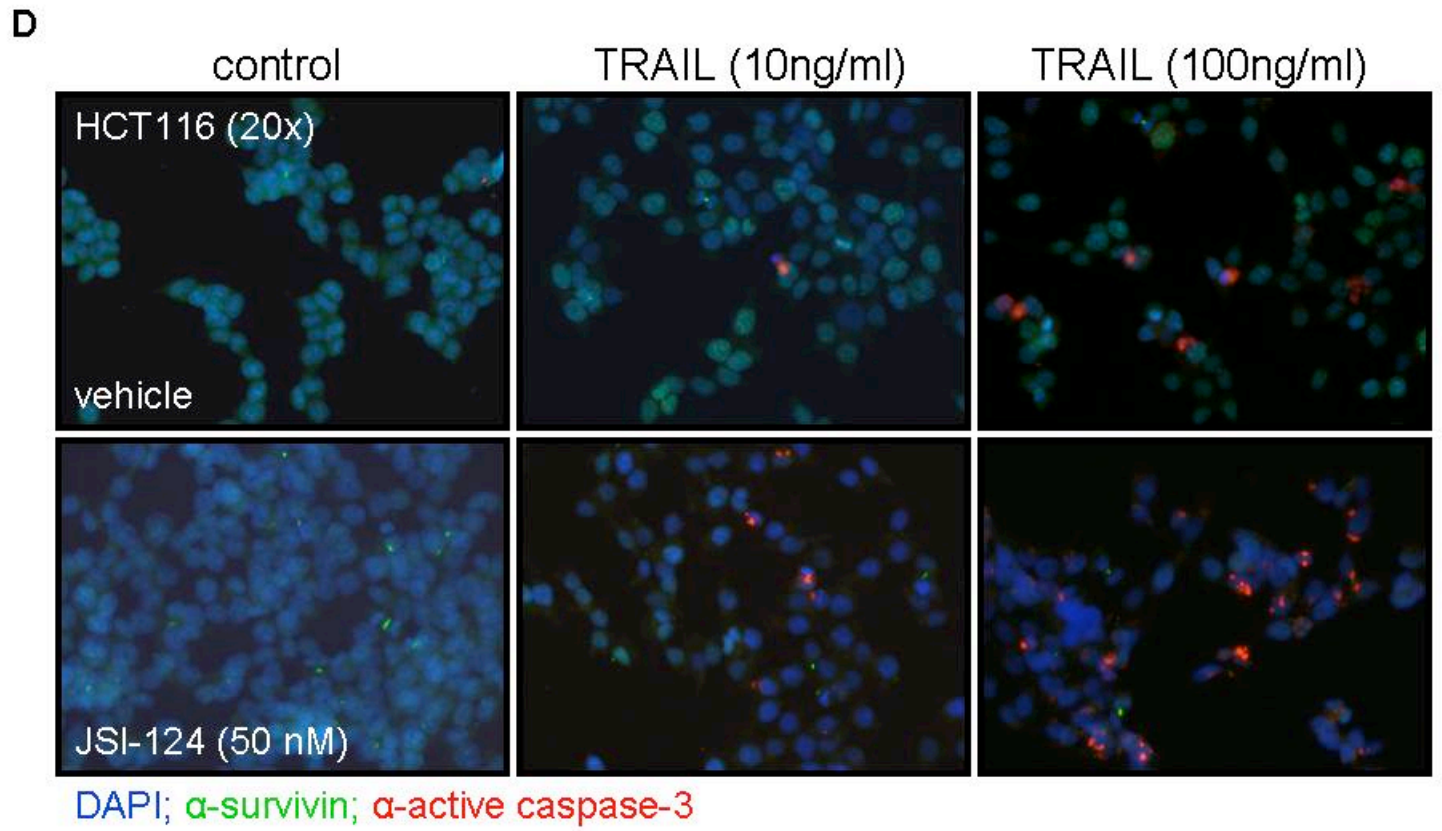

**E**

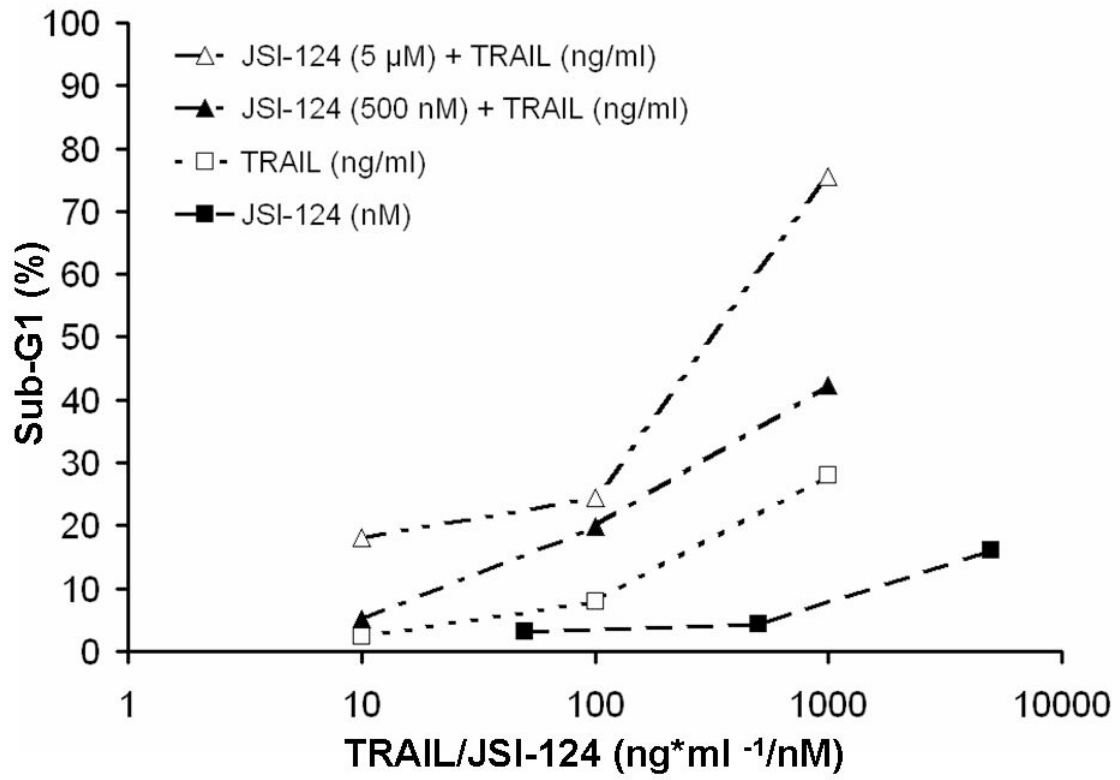

**Supplemental Table I: Genes upregulated more than 2-fold in wild-type E $\mu$ -myc lymphomas relative to TRAIL-R-deficient E $\mu$ -myc lymphomas**

| <b>Gene Name</b> | <b>Fold change<sup>1</sup></b> | <b>Description</b>                                          |
|------------------|--------------------------------|-------------------------------------------------------------|
| 1460423_x_at     | 11.85                          | Ig kappa chain                                              |
| 1420721_at       | 7.115                          | RIKEN cDNA 4921536K21 gene                                  |
| 1424303_at       | 6.511                          | expressed sequence AV216087                                 |
| 1418558_at       | 4.523                          | retina and anterior neural fold homeobox                    |
| 1452318_a_at     | 3.901                          | heat shock protein 1B                                       |
| 1433483_s_at     | 3.793                          | expressed sequence C86187                                   |
| 1425426_a_at     | 3.54                           | myocyte enhancer factor 2A                                  |
| 1452453_a_at     | 3.418                          | calcium/calmodulin-dependent protein kinase II alpha        |
| 1460469_at       | 3.388                          | tumor necrosis factor receptor superfamily, member 9        |
| 1456212_x_at     | 2.989                          | suppressor of cytokine signaling 3                          |
| 1434772_at       | 2.778                          | adenosine A2b receptor                                      |
| 1421241_at       | 2.735                          | nerve growth factor receptor (TNFR superfamily, member 16)  |
| 1427127_x_at     | 2.62                           | heat shock protein 1B                                       |
| 1427126_at       | 2.474                          | heat shock protein 1B                                       |
| 1455899_x_at     | 2.462                          | suppressor of cytokine signaling 3                          |
| 1420508_at       | 2.253                          | sema domain, immunoglobulin domain (Ig), short basic domain |
| 1423603_at       | 2.292                          | zink finger protein, multitype 1                            |
| 1428359_s_at     | 2.146                          | RIKEN cDNA 1810010M01 gene                                  |
| 1424638_at       | 2.174                          | cyclin-dependent kinase inhibitor 1A (P21)                  |
| 1418943_at       | 2.162                          | RIKEN cDNA B230120H23 gene (MALTK)                          |

<sup>1</sup> Fold change relative TRAIL-R<sup>-/-</sup> E $\mu$ -myc lymphomas

## Supplemental Tables

Supplemental Table I: **Genes downregulated more than 2-fold in wild-type Eμ-myc lymphomas relative to TRAIL-R-deficient Eμ-myc lymphomas**

| Gene Name    | Fold change <sup>1</sup> | Description                                                               |
|--------------|--------------------------|---------------------------------------------------------------------------|
| 1431913_a_at | 0.489                    | phosphodiesterase 3A, cGMP inhibited                                      |
| 1460327_at   | 0.487                    | G-protein coupled receptor 88                                             |
| 1448842_at   | 0.484                    | cysteine dioxygenase-1, cytosolic                                         |
| 1437531_at   | 0.481                    | transient receptor potential cation channel, subfamily M, member          |
| 1424700_at   | 0.454                    | transmembrane protein 38B                                                 |
| 1452308_a_at | 0.438                    | ATPase, Na <sup>+</sup> /K <sup>+</sup> transporting, alpha 2 polypeptide |
| 1424553_at   | 0.429                    | Gup1, glycerol uptake/transporter homolog (yeast)                         |
| 1449910_at   | 0.415                    | RIKEN cDNA 2210418010 gene                                                |
| 1449417_at   | 0.396                    | Ameloblastin                                                              |
| 1433924_at   | 0.392                    | Peg3 mRNA for zinc finger protein                                         |
| 1438182_x_at | 0.389                    | ankyrin repeat and SOCS box-containing protein 6                          |
| 1436388_a_at | 0.381                    | RIKEN cDNA 3830406C13 gene                                                |
| 1452561_at   | 0.379                    | Latrophilin mRNA, (cDNA clone IMAGE:30549106)                             |
| 1420335_at   | 0.354                    | disrupted meiotic cDNA 1 homolog                                          |
| 1424493_s_at | 0.352                    | UDP glycosyltransferases 3 family, polypeptide A1                         |
| 1427968_at   | 0.319                    | TGIF homeobox 1                                                           |
| 1425256_a_at | 0.302                    | DIX domain containing 1                                                   |
| 1427509_at   | 0.273                    | gene model 937, (NCBI)                                                    |
| 1422977_at   | 0.273                    | glycoprotein Ib, beta polypeptide                                         |
| 1450369_at   | 0.266                    | factor in the germline alpha                                              |
| 1449088_at   | 0.261                    | fructose biphosphatase 2                                                  |
| 1456461_at   | 0.256                    | Erwing sarcoma breakpoint region 1                                        |
| 1417276_at   | 0.253                    | tubby-like protein 2                                                      |
| 1430457_at   | 0.24                     | decay accelerating factor 2                                               |
| 1449832_at   | 0.237                    | RIKEN cDNA 1700091H14 gene                                                |
| 1417389_at   | 0.235                    | glypican 1                                                                |
| 1422150_at   | 0.233                    | H6 homeo box 3                                                            |
| 1426562_a_at | 0.208                    | olfactomedin 1                                                            |
| 1421482_at   | 0.2                      | Bartter syndrome, infantile, with sensorineural deafness (Barttin)        |
| 1454267_a_at | 0.184                    | protease, serine, 32                                                      |
| 1437054_x_at | 0.181                    | protamine 1                                                               |
| 1420544_at   | 0.18                     | germinal center expressed transcript 2                                    |
| 1426340_at   | 0.18                     | solute carrier family 1, (glial high affinity glutamate transporter), 1   |
| 1422051_a_at | 0.18                     | gamma-aminobutyric acid (GABA-B) receptor, 1                              |

|              |        |                                                                 |
|--------------|--------|-----------------------------------------------------------------|
| 1452065_at   | 0.179  | cDNA sequence BC027127                                          |
| 1435837_at   | 0.176  | crystallin, alpha B                                             |
| 1423381_at   | 0.165  | RIKEN cDNA 4921521F21 gene                                      |
| 1427315_at   | 0.159  | transmembrane emp24 protein transport domain containing 7       |
| 1434553_at   | 0.158  | transmembrane protein 56                                        |
| 1423331_a_at | 0.116  | poliovirus receptor related-3                                   |
| 1420444_at   | 0.108  | solute carrier family 22 (organic cation transporter), member 3 |
| 1449347_a_at | 0.0523 | X-linked lymphocyte-regulated 4B, X-linked lymphocyte regulated |

<sup>1</sup> Fold change relative TRAIL-R-/- Eμ-*myc* lymphomas
